# Supplementary material
Source: PubMed Central journal article supplement (PMC4325741)
Supplement: JVI.02007-14_zjv999090091so1.pdf [file JVI.02007-14_zjv999090091so1.pdf]

**Supplemental Table 1. List of primers used for qPCR and mutations**

| Candidate Name      | Stem-loop primer sequence for RT (5'-3')                                        |
|---------------------|---------------------------------------------------------------------------------|
| sncRNA-U2 SL        | GTCTGATCCAGTGCAGGGTCCGAGGTATTCGCACTGGATACGAC <b>ACGAGG</b>                      |
| sncRNA-U3-1 SL      | GTCTGATCCAGTGCAGGGTCCGAGGTATTCGCACTGGATACGAC <b>TACGAT</b>                      |
| sncRNA-U3-2 SL      | GTCTGATCCAGTGCAGGGTCCGAGGTATTCGCACTGGATACGAC <b>GAGTCA</b>                      |
| sncRNA-U14 SL       | GTCTGATCCAGTGCAGGGTCCGAGGTATTCGCACTGGATACGAC <b>CGACGT</b>                      |
| sncRNA-U54 SL       | GTCTGATCCAGTGCAGGGTCCGAGGTATTCGCACTGGATACGAC <b>ACGATA</b>                      |
| sncRNA-U77 SL       | GTCTGATCCAGTGCAGGGTCCGAGGTATTCGCACTGGATACGAC <b>AGAAA</b>                       |
| miR-U86 SL          | GTCTGATCCAGTGCAGGGTCCGAGGTATTCGCACTGGATACGAC <b>GACACC</b>                      |
|                     | <b>5' primer sequence for qPCR (5'-3')</b>                                      |
| sncRNA-U2 5'qPCR    | GCCGCCTGTCTCCGGCGTA                                                             |
| sncRNA-U3-1 5'qPCR  | GCCGCCTAGTATCCTTAACGC                                                           |
| sncRNA-U3-2 5'qPCR  | GCCGCCTTATAAATACTGA                                                             |
| sncRNA-U14 5'qPCR   | GCCGCTAAGAGCTCTGTCTGA                                                           |
| sncRNA-U54 5'qPCR   | GCCGCCTCTGCCTTAAATGA                                                            |
| sncRNA-U77 5'qPCR   | GCCGCTGAATATGCTTGCTT                                                            |
| miR-U86 5'qPCR      | GCCGCTAGAACTTTCTGAAT                                                            |
|                     | <b>TaqMan probe for qPCR (5'-3')</b>                                            |
| sncRNA-U2 TaqMan    | 6FAM-TACGACACGAGGATA-mgbNFQ                                                     |
| sncRNA-U3-1 TaqMan  | 6FAM-TACGACTACGATCGC-mgbNFQ                                                     |
| sncRNA-U3-2 TaqMan  | 6FAM-TACGACGAGTCACTC-mgbNFQ                                                     |
| sncRNA-U14 TaqMan   | 6FAM-TACGACCGACGCTC-mgbNFQ                                                      |
| sncRNA-U54 TaqMan   | 6FAM-TACGACACGATATTC-mgbNFQ                                                     |
| sncRNA-U77 TaqMan   | 6FAM-TACGACAGAAAATA-mgbNFQ                                                      |
| miR-U86 TaqMan      | 6FAM-TACGACGACACCGAT-mgbNFQ                                                     |
|                     | <b>Stem-loop primer sequence for RT (5'-3')</b>                                 |
| sncRNA-U2 SL (-3)   | GTCTGATCCAGTGCAGGGTCCGAGGTATTCGCACTGGATACGAC <b>AGGATA</b>                      |
| sncRNA-U2 SL (+3)   | GTCTGATCCAGTGCAGGGTCCGAGGTATTCGCACTGGATACGAC <b>CAGACG</b>                      |
| sncRNA-U3-1 SL (-3) | GTCTGATCCAGTGCAGGGTCCGAGGTATTCGCACTGGATACGAC <b>GATCGC</b>                      |
| sncRNA-U3-1 SL (+3) | GTCTGATCCAGTGCAGGGTCCGAGGTATTCGCACTGGATACGAC <b>GTCTAC</b>                      |
| sncRNA-U14 SL (-3)  | GTCTGATCCAGTGCAGGGTCCGAGGTATTCGCACTGGATACGAC <b>CGTCTC</b>                      |
| sncRNA-U14 SL (+3)  | GTCTGATCCAGTGCAGGGTCCGAGGTATTCGCACTGGATACGAC <b>ATGCGA</b>                      |
| sncRNA-U54 SL (-3)  | GTCTGATCCAGTGCAGGGTCCGAGGTATTCGCACTGGATACGAC <b>ATATTC</b>                      |
| sncRNA-U54 SL (+3)  | GTCTGATCCAGTGCAGGGTCCGAGGTATTCGCACTGGATACGAC <b>AACACG</b>                      |
| miR-U86 SL (-3)     | GTCTGATCCAGTGCAGGGTCCGAGGTATTCGCACTGGATACGAC <b>ACCGAT</b>                      |
| miR-U86 SL (+3)     | GTCTGATCCAGTGCAGGGTCCGAGGTATTCGCACTGGATACGAC <b>GACGAC</b>                      |
|                     | <b>Primers for galK insert (5'-3')</b>                                          |
| sncRNA-U2-galK-F    | CGAGAGAAGGAGAGAGAGAGAGAGACGGGAGGCAGAGCCGCGAGAGGGCAGCCTGTTGACAATTAATCATCGGCA     |
| sncRNA-U2-galK-R    | CACCCCTCTCTCGCGCGCGGGCCCTCTCGGGAACGACCGCGGCGCTTCAGCACTGTCTGCTCCTT               |
| sncRNA-U3-1-galK-F  | AAAAAATATAACGATAACGACAGCGTTACCGGCAGTCTCGCATAAACCGTCCCTGTTGACAATTAATCATCGGCA     |
| sncRNA-U3-1-galK-R  | ATAACGTCGGGAATGTGTGTCAGTTCAACGCTGCTTTTTCCCTAACAGTCTCAGCACTGTCTGCTCCTT           |
| sncRNA-U14-galK-F   | AACATATGATTACAATGATGAAAAGTCTTTTCGACACCGAAGAAGCCATGCTGTTGACAATTAATCATCGGCA       |
| sncRNA-U14-galK-R   | AGGCTATGAGAGGCATATATGAACTACCCAGCAGCATCGACAACAGCCCTCAGCACTGTCTGCTCCTT            |
| sncRNA-U54-galK-F   | AATCAAGTGGCTGATATACGATGGATGAACAACACCCAGAAGAGCCAACCTGTTGACAATTAATCATCGGCA        |
| sncRNA-U54-galK-R   | CAGTTTTAAAAATTTGGTTCGAGCGGAGTGTGTTGGAGATTAACCCATATTCAGCACTGTCTGCTCCTT           |
| miR-U86-galK-F      | CGATTCAGACCTCATATAAGAACCAACAGAAAAAATCAGAATCCACCAACCTGTTGACAATTAATCATCGGCA       |
| miR-U86-galK-R      | AACGGTCAGTGAATCTGGTGAATTTGACAGTGAATTTGACATCAGACATCAGCACTGTCTGCTCCTT             |
|                     | <b>Reversion oligos (5'-3')</b>                                                 |
| sncRNA-U2 Rev       | AGAGAGAGAGAGAGACGGGAGGCAGAGCCGCGAGAGGGCAGAACGCGCGGCTGTTCCCGAGGAGGGCCGCGCGCGCG   |
| sncRNA-U3-1 Rev     | ACGATAACGACAGCGTTACCGGCAGTCTCGCATAAACGTCGACTGTTAGGGAAAAAAGACAGCGTTGAAGTACACATTC |
| sncRNA-U14 Rev      | CAACATATGATTACAATGATGAAAAGTCTTTTCGACACCGAAGAAGCCATGTGATGTAAGTACCGAATTAAGTGGGGC  |
| sncRNA-U54 Rev      | AAAATTCAGTGGCTGATATACGATGGATGAACAACACCCAGAAGAGCCAACGAGGTACAGCTTCAAAGCGGAAATATG  |
| miR-U86 Rev         | CCCGATTACAGCTCATATAAGAACCAACAGAAAAAATCAGAATCCACCAACGATACAGACAGCGAGTCGAGCATGTCT  |
|                     | <b>Oligos for lentivirus insert (5'-3')</b>                                     |
| sncRNA-U2 Lenti B   | TTTGTCTCTCTCCGGCGTATCCTCGTGTGAAGCCACAGATGACGAGGATACGCGGAGGAGAGATTTTT            |
| sncRNA-U3-1 Lenti B | CGAAAAATCTCTCCTCCGCGTATCCTCGTATCTGTGGCTTACACAGAGGATACGCGGAGGAGAGATA             |
| sncRNA-U3-1 Lenti T | TTTGGTAGTATCTTAAACCGATCGTAGTGAAGCCACAGATGTACGATCGGTTAAGGATACTACTTTTT            |
| sncRNA-U3-1 Lenti B | CGAAAAAGTAGTATCCTTAAACCGATCGTACATCTGTGGCTTCACTACGATCGGTTAAGGATACTACT            |
| sncRNA-U14 Lenti T  | TTTGATAAGGACTCTGTGAGACGTCGGTGAAGCCACAGATGCGACGTCGACAGAGCTCTTATTTTTT             |
| sncRNA-U14 Lenti B  | CGAAAAAATAAGAGCTCTGTGAGACGTCGATCTGTGGCTTCAACGACGTCGACAGAGCTCTTAT                |
| sncRNA-U54 Lenti T  | TTTGTCTGCTTAAATGAATATCGTGGTGAAGCCACAGATGACGATATTCATTAAGGCAGAGTTTTT              |
| sncRNA-U54 Lenti B  | CGAAAAACTCTGCCTTAAATGAATATCGTGCATCTGTGGCTTCAACAGATATTCATTTAAGGCAGAG             |
| miR-U86 Lenti T     | TTTGTAGAATTTCTGAATCGGTGTGCTGAAGCCACAGATGGACACCGATTGAGAAAGTTTCTTTTTT             |
| miR-U86 Lenti B     | CGAAAAATAGAATTTCTGAATCGGTGTGCATCTGTGGCTTCAACAGACCGATTGAGAAAGTTTCTA              |
|                     | <b>Primers for qPCR to detect there kinetic transcripts (5'-3')</b>             |
| U90 For             | TCAGGTATCGAAGGATGTA                                                             |
| U90 Rev             | CCCTCTGGAACAACATGGGAT                                                           |
| U100 For            | CATAGTCTGTCCGCCATTGTTT                                                          |
| U100 Rev            | CGCCAAACTACAAAGTGAAG                                                            |
| U12 For             | CTGTCCAAACTTCTGCGCA                                                             |
| U12 Rev             | CGGTAACCTGCCCTCTCCATG                                                           |
|                     | <b>TaqMan probe for qPCR (5'-3')</b>                                            |
| U90 For             | 6FAM-AACGTATGCAAGACTACCGTC-mgbNFQ                                               |
| U90 Rev             | 6FAM-TCAGTTCGATAGAGT-mgbNFQ                                                     |
| U100 For            | 6FAM-CTCGACACCCACGCT-mgbNFQ                                                     |
|                     | <b>Primers for qPCR</b>                                                         |
| MDM2 For            | CCCCTCCATCACATTGCA                                                              |
| MDM2 Rev            | AGTTTGGCTTTCTCAGAGATTTCC                                                        |
| eGFP For            | ACCACTACCTGAGCACCAGTC                                                           |
| eGFP Rev            | GTCCATGCCGAGAGTGATCC                                                            |

Bold/italic regions are unique to each candidate

Underlined regions of oligos represent overhangs for BbsI (5') and BstBI (3') digestion
